# Supplementary material for: Strengthening evidence to inform health systems: opportunities for the WHO and partners to accelerate progress on non-communicable diseases
Source: PubMed Central journal article supplement — BMJ Glob Health. 2023 Nov 19;8(11):e013994. doi: 10.1136/bmjgh-2023-013994 (PMC10660806; doi:10.1136/bmjgh-2023-013994), 2023-11-19
Supplement: bmjgh-2023-013994supp001.pdf [file bmjgh-2023-013994supp001.pdf]

**Annex 1: Members of WHO NCD R&I TAG include (as of June 2023):**

Abeer Al Saegh<sup>1</sup>, Valery Feigin<sup>2</sup>, Adnan A Hyder<sup>3</sup>, Tiina Laatikainen<sup>4</sup>, Liming Li<sup>5</sup>, Yodi Mahendradhata<sup>6</sup>, J. Jaime Miranda<sup>7,8,9</sup>, Mayowa Owolabi<sup>10</sup>, Srinath Reddy<sup>11</sup>, Richard Sullivan<sup>12</sup>, Salim S. Virani<sup>13,14</sup>

Affiliations: <sup>1</sup>Department of Genetics, College of Medicine and Health Sciences, Sultan Qaboos University, Muscat, Oman; <sup>2</sup>National Institute for Stroke and Applied Neurosciences, Auckland University of Technology, Auckland, New Zealand; <sup>3</sup>Milken Institute School of Public Health, George Washington University, Washington, D.C, USA; <sup>4</sup>Institute of Public Health and Clinical Nutrition, University of Eastern Finland, Kuopio, Finland; <sup>5</sup>School of Public Health, Peking University, Beijing, China; <sup>6</sup>Faculty of Medicine, Public Health and Nursing, Universitas Gadjah Mada, Yogyakarta, Indonesia; <sup>7</sup>Universidad Peruana Cayetano Heredia in Lima, Peru; <sup>8</sup>The George Institute for Global health, The University of New South Wales, Sydney, New South Wales, Australia; <sup>9</sup>Faculty of Epidemiology and Population Health, London School of Hygiene and Tropical Medicine, London, UK; <sup>10</sup>Department of Medicine and Center for Genomic and Precision Medicine, University of Ibadan, Ibadan, Nigeria; <sup>11</sup>Public Health Foundation of India, Haryana, India; <sup>12</sup>Conflict and Health Research Group, King's College, London, UK; <sup>13</sup>Section of Cardiovascular Research, Baylor College of Medicine, USA; <sup>14</sup>Aga Khan University, Karachi, Pakistan
